# Supplementary material
Source: PubMed Central journal article supplement (PMC2867318)
Supplement: supp_137.11.1825_DEV045484TableS1.pdf [file supp_137.11.1825_DEV045484TableS1.pdf]

**Table S1. Primers used to sequence *Vha68-2***

| Primer | Sequence (5' to 3')     |
|--------|-------------------------|
| left1  | GCCAGCATTTAACAATTTTCC   |
| right1 | CATCAAAGTAAGGTTTCCAGTTC |
| left2  | GGAACCTATCTTCGTTTGCTG   |
| right2 | GCGATGTAGCGCACTGTTC     |
| left3  | TTAACGAGCTGACCGAATCC    |
| right3 | GGCATCGCTCCTTAAATTCTC   |
| left4  | GCCTCGTGTAGCCTCCATAC    |
| right4 | GGTTACCCAAGCACTTAACG    |
| left5  | GTGTCCATGATGGCTGATTC    |
| right5 | TCTCCTTGACCTTGGTACGC    |
| left6  | GCTGCGTACCAAGGTCAAG     |
| right6 | CGGATGGTTTTTGACTGCTT    |
